# Supplementary material for: Single network double cross-linker (SNDCL) hydrogels with excellent stretchability, self-recovery, adhesion strength, and conductivity for human motion monitoring
Source: Royal Society of Chemistry journal article supplement (doi:10.1039/d0sm00375a), 2020-01-01
Supplement: d0sm00375a1.pdf [file d0sm00375a1.pdf]

## Supporting Information

### **Single network double cross-linkers (SNDCL) hydrogels with excellent stretchability, self-recovery, adhesion strength, conductivity for human motion monitoring**

Zhenghao Li<sup>a#</sup>, Xiangxin Meng<sup>a#</sup>, Wenlong Xu<sup>a\*</sup>, Shiqiang Zhang<sup>a</sup>, Jiahui Ouyang<sup>a</sup>, Zhuo Zhang<sup>b</sup>, Yihan Liu<sup>b</sup>, Yuzhong Niu<sup>a</sup>, Songmei Ma<sup>a</sup>, Zhongxin Xue<sup>a</sup>, Aixin Song<sup>b</sup>, Shaohua Zhang<sup>a\*</sup> and Chunguang Ren<sup>c\*</sup>

*<sup>a</sup>School of Chemistry and Materials Science, Ludong University, Yantai, 264025, China*

*<sup>b</sup>Key Laboratory of Colloid and Interface Chemistry, Shandong University, Ministry of Education, Jinan, 250100, China*

*<sup>c</sup>Yantai Institute of Materia Medica, Yantai, 264000, China*

# These authors contributed equally.

\* Corresponding author:

Wenlong Xu: xuwenlong@ldu.edu.cn

Shaohua Zhang: zhangshaohua@ldu.edu.cn

Chunguang Ren: cgren@simmyt.ac.cn

Table 1. Tensile length comparison of PAAm hydrogels among this work and those in literatures.

| References & Years | Components       | Tensile length |
|--------------------|------------------|----------------|
| 2016 <sup>1</sup>  | PSS/Acrylamide   | 525%           |
| 2017 <sup>2</sup>  | PAAM/CS          | 1000%          |
| 2017 <sup>3</sup>  | PAAm/LiCl        | 2000%          |
| 2017 <sup>4</sup>  | Gelatin/PAAm     | 3500%          |
| 2019 <sup>5</sup>  | HPAAm/CS-c-MWCNT | 2761%          |
| 2019 <sup>6</sup>  | Amy/PAAm/PVA DN  | 549%           |
| 2019 <sup>7</sup>  | PVA/PAAm/DA      | 220%           |
| 2019 <sup>8</sup>  | PAAM/PVP         | 22000%         |
| 2019 <sup>9</sup>  | AG/PAAm/LiCl     | 2185%          |
| 2019 <sup>10</sup> | PAM/Au@PDA GW    | 900%           |
| Our work           | PAAm (MBA/CA)    | 6564%          |

Table 2. Adhesion strength comparison of hydrogels among this work and those in literatures

| References & Years | Components                                                                                      | Adhesion strength / MPa |         |        |       |
|--------------------|-------------------------------------------------------------------------------------------------|-------------------------|---------|--------|-------|
|                    |                                                                                                 | Metal                   | Hogskin | Glass  | wood  |
| 2015 <sup>11</sup> | PAA/dopamine /ZnCl <sub>2</sub>                                                                 | 6.1                     |         |        |       |
| 2017 <sup>12</sup> | PDA/clay/PAM                                                                                    | 0.17                    | 0.03    | 0.12   |       |
| 2017 <sup>13</sup> | Poly(catechol-styrene)                                                                          | 2.9                     |         |        |       |
| 2018 <sup>14</sup> | ACC/Polyacrylic acid                                                                            | 4.75                    |         | 0.6    | 3.2   |
| 2018 <sup>15</sup> | PDA/CS/PAM                                                                                      |                         | 0.03    |        |       |
| 2018 <sup>16</sup> | Soluble starch/<br>NaSS/MOBAB/GO                                                                | 60.5                    | 0.13    |        |       |
| 2018 <sup>17</sup> | Dopamine/talc/PAM                                                                               | 0.82                    |         | 0.4    | 0.6   |
| 2018 <sup>18</sup> | PACG/Hap                                                                                        | 0.13                    | 0.11    |        |       |
| 2018 <sup>19</sup> | PAAm/PAA/DA                                                                                     |                         | 0.06    |        |       |
| 2019 <sup>20</sup> | gelatin/glycerol/Na <sub>3</sub> Cit                                                            | 0.71                    |         | 0.42   |       |
| 2019 <sup>21</sup> | CS/PAA DN<br>nanocomposite                                                                      | 0.01                    |         | 0.01   | 0.02  |
| 2019 <sup>22</sup> | POPEA-b-PEG/KPS/<br>acrylate nucleobase                                                         |                         | 0.01    | 0.05   |       |
| 2019 <sup>23</sup> | acrylicacid/dopamine-<br>functionalized<br>hyaluronic<br>acid/Fe(NO <sub>3</sub> ) <sub>3</sub> | 0.03                    | 0.01    |        |       |
| 2019 <sup>24</sup> | PVA/TA/CNC/borax                                                                                | 0.071                   | 0.05    | 0.065  | 0.117 |
| 2019 <sup>25</sup> | PEGDA/PEG                                                                                       |                         |         | 0.0456 |       |
| Our work           | PAAm (MBA/CA)                                                                                   | 0.167                   | 0.876   | 1.64   | 1.70  |

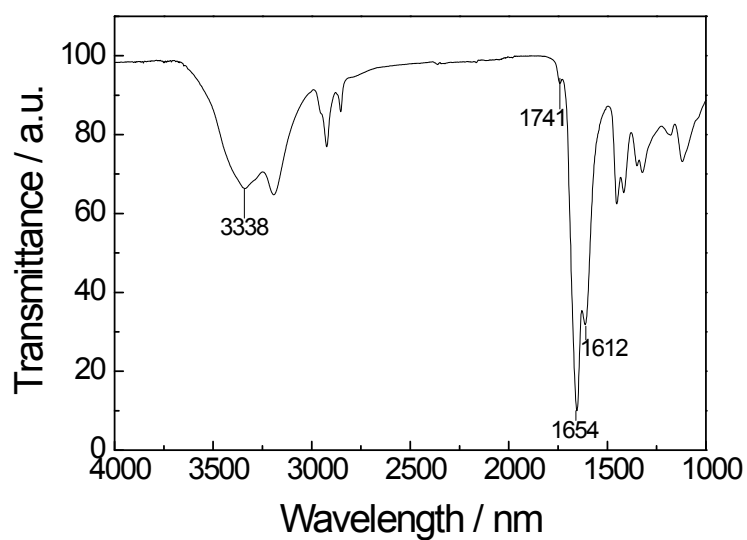

Figure S1. ATR-FTIR spectrum of the SNDCL PAAm hydrogel with **MBA** concentration of 0.006% and **CA** concentration of 0.03%.

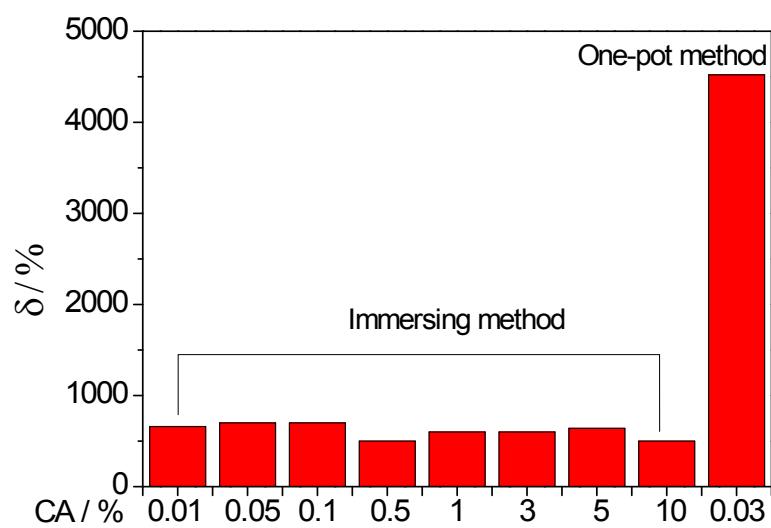

Figure S2. Stretchability of hydrogels prepared by double cross-linkers in immersing method and one-pot method with **MBA** concentration of 0.01% and different CA concentrations.

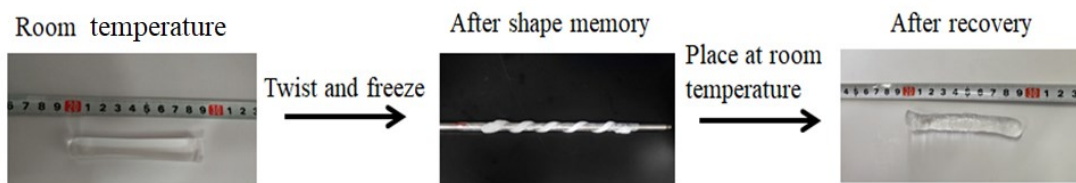

Figure S3. Shape recovery of the twisted and freezed SNDCL hydrogel after thawing.

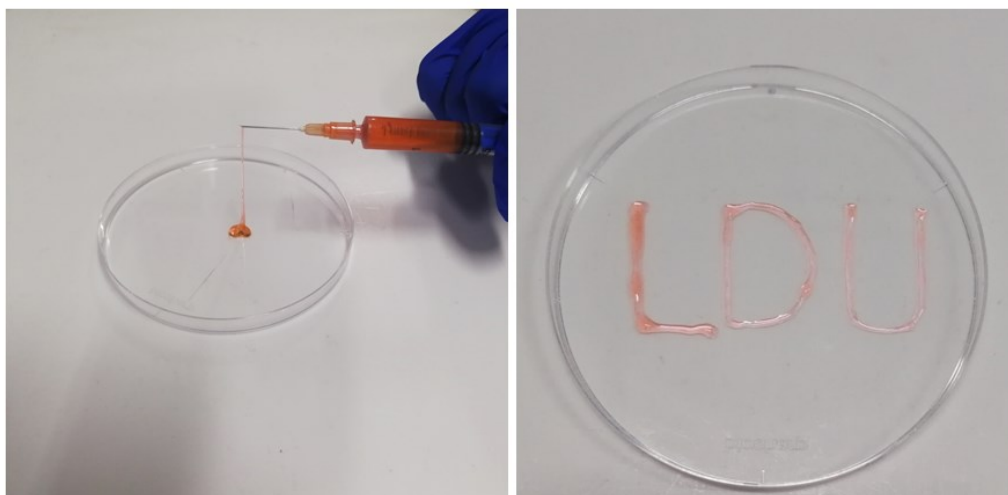

Figure S4. Injectability of the SNDCL hydrogel in a syringe with 20 G needle.

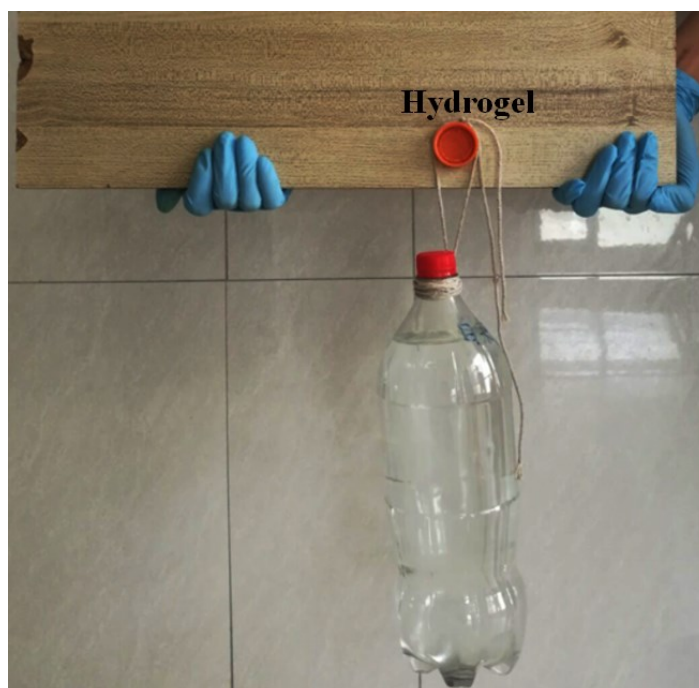

Figure S5. Adhesive ability of the SNDCL hydrogel lifting a 2 kg bottle of water.

## References

1. Lee, Y. Y.; Kang, H. Y.; Gwon, S. H.; Choi, G. M.; Lim, S. M.; Sun, J. Y.; Joo, Y. C., A Strain-Insensitive Stretchable Electronic Conductor: PEDOT:PSS/Acrylamide Organogels. *Adv. Mater.* **2016**, *28*, 1636-1643.
2. Zhang, S.; Wei, Q.; Shang, Y.; Zhang, Q.; Wang, Q., D-Serine Enzymatic Metabolism Induced Formation of a Powder-Remoldable PAAM-CS Hydrogel. *Chem Commun* **2017**, *53*, 12270-12273.
3. Pu., X.; Liu., M.; Chen., X.; Sun., J.; Du., C.; Zhang., Y.; Zhai., J.; Hu., W.; Wang., Z. L., Ultrastretchable, Transparent Triboelectric Nanogenerator as Electronic Skin for Biomechanical Energy Harvesting and Tactile Sensing. *Sci. Adv.* **2017**, *3*, 1700015.
4. Yan, X.; Chen, Q.; Zhu, L.; Chen, H.; Wei, D.; Chen, F.; Tang, Z.; Yang, J.; Zheng, J., High Strength and Self-Healable Gelatin/Polyacrylamide Double Network Hydrogels. *J. Mater. Chem. B* **2017**, *5*, 7683-7691.
5. Xia, S.; Song, S.; Jia, F.; Gao, G., A Flexible, Adhesive and Self-Healable Hydrogel-Based Wearable Strain Sensor for Human Motion and Physiological Signal Monitoring. *J. Mater. Chem. B* **2019**, *7*, 4638-4648.
6. Zhang, Y.; Li, D.; Huang, Y.; Long, S.; Li, H.; Li, X., Super Bulk and Interfacial Toughness of Amylopectin Reinforced PAAm/PVA Double-Network Hydrogels via Multiple Hydrogen Bonds. *Macromol. Mater. Eng.* **2019**, 1900450.
7. Wu, Y.; Yu, C.; Xing, M.; Wang, L.; Guan, G., Surface Modification of Polyvinyl Alcohol (PVA)/Polyacrylamide (PAAm) Hydrogels with Polydopamine

and REDV for Improved Applicability. *J. Biomed. Mater. Res., Part B* **2019**, *00B*, 1-11.

8. Zhang, H.; Niu, W.; Zhang, S., Extremely Stretchable and Self-Healable Electrical Skin with Mechanical Adaptability, an Ultrawide Linear Response Range, and Excellent Temperature Tolerance. *ACS Appl. Mater. Interfaces* **2019**, *11*, 24639-24647.

9. Fang, L.; Cai, Z.; Ding, Z.; Chen, T.; Zhang, J.; Chen, F.; Shen, J.; Chen, F.; Li, R.; Zhou, X.; Xie, Z., Skin-Inspired Surface-Microstructured Tough Hydrogel Electrolytes for Stretchable Supercapacitors. *ACS Appl. Mater. Interfaces* **2019**, *11*, 21895-21903.

10. Xia, Y.; Wu, Y.; Yu, T.; Xue, S.; Guo, M.; Li, J.; Li, Z., Multifunctional Glycerol-Water Hydrogel for Biomimetic Human Skin with Resistance Memory Function. *ACS Appl. Mater. Interfaces* **2019**, *11*, 21117-21125.

11. Wang, W.; Xu, Y.; Li, A.; Li, T.; Liu, M.; von Klitzing, R.; Ober, C. K.; Kayitmazer, A. B.; Li, L.; Guo, X., Zinc Induced Polyelectrolyte Coacervate Bioadhesive and Its Transition to a Self-Healing Hydrogel. *RSC Adv.* **2015**, *5*, 66871-66878.

12. Han, L.; Lu, X.; Liu, K.; Wang, K.; Fang, L.; Weng, L. T.; Zhang, H.; Tang, Y.; Ren, F.; Zhao, C.; Sun, G.; Liang, R.; Li, Z., Mussel-Inspired Adhesive and Tough Hydrogel Based on Nanoclay Confined Dopamine Polymerization. *ACS Nano* **2017**, *11*, 2561-2574.

13. North, M. A.; Del Grosso, C. A.; Wilker, J. J., High Strength Underwater

Bonding with Polymer Mimics of Mussel Adhesive Proteins. *ACS Appl. Mater. Interfaces* **2017**, *9*, 7866-7872.

14. Li, A.; Jia, Y.; Sun, S.; Xu, Y.; Minsky, B. B.; Stuart, M. A. C.; Colfen, H.; von Klitzing, R.; Guo, X., Mineral-Enhanced Polyacrylic Acid Hydrogel as an Oyster-Inspired Organic-Inorganic Hybrid Adhesive. *ACS Appl. Mater. Interfaces* **2018**, *10*, 10471-10479.

15. Han, L.; Wang, M.; Li, P.; Gan, D.; Yan, L.; Xu, J.; Wang, K.; Fang, L.; Chan, C. W.; Zhang, H.; Yuan, H.; Lu, X., Mussel-Inspired Tissue-Adhesive Hydrogel Based on the Polydopamine-Chondroitin Sulfate Complex for Growth-Factor-Free Cartilage Regeneration. *ACS Appl. Mater. Interfaces* **2018**, *10*, 28015-28026.

16. Wang, Y.; Huang, F.; Chen, X.; Wang, X.-W.; Zhang, W.-B.; Peng, J.; Li, J.; Zhai, M., Stretchable, Conductive, and Self-Healing Hydrogel with Super Metal Adhesion. *Chem. Mater.* **2018**, *30*, 4289-4297.

17. Jing, X.; Mi, H. Y.; Lin, Y. J.; Enriquez, E.; Peng, X. F.; Turng, L. S., Highly Stretchable and Biocompatible Strain Sensors Based on Mussel-Inspired Super-Adhesive Self-Healing Hydrogels for Human Motion Monitoring. *ACS Appl. Mater. Interfaces* **2018**, *10*, 20897-20909.

18. Cui., C.; Wu., T.; Gao., F.; Chuanchuan Fan; Xu., Z.; Wang., H.; Liu., B.; Liu., W., An Autolytic High Strength Instant Adhesive Hydrogel for Emergency Self-Rescue. *Adv. Funct. Mater.* **2018**, *28*, 1804925.

19. Han., L.; Liu., K.; Wang., M.; Wang., K.; Fan., L.; Chen., H.; Zhou., J.; Lu., X., Mussel-Inspired Adhesive and Conductive Hydrogel with Long-Lasting Moisture and



- Extreme Temperature Tolerance. *Adv. Funct. Mater.* **2018**, *28*, 1704195.
20. Qin, Z.; Dong, D.; Yao, M.; Yu, Q.; Sun, X.; Guo, Q.; Zhang, H.; Yao, F.; Li, J., Freezing-Tolerant Supramolecular Organohydrogel with High Toughness, Thermoplasticity, and Healable and Adhesive Properties. *ACS Appl. Mater. Interfaces* **2019**, *11*, 21184-21193.
21. Cui, C.; Shao, C.; Meng, L.; Yang, J., High-Strength, Self-Adhesive, and Strain-Sensitive Chitosan/Poly(acrylic acid) Double-Network Nanocomposite Hydrogels Fabricated by Salt-Soaking Strategy for Flexible Sensors. *ACS Appl. Mater. Interfaces* **2019**, *11*, 39228-39237.
22. Wang, W.; Liu, S.; Chen, B.; Yan, X.; Li, S.; Ma, X.; Yu, X., DNA-Inspired Adhesive Hydrogels Based on the Biodegradable Polyphosphoesters Tackified by a Nucleobase. *Biomacromolecules* **2019**, *20*, 3672-3683.
23. Zhang, Z.; Gao, Z.; Wang, Y.; Guo, L.; Yin, C.; Zhang, X.; Hao, J.; Zhang, G.; Chen, L., Eco-Friendly, Self-Healing Hydrogels for Adhesive and Elastic Strain Sensors, Circuit Repairing, and Flexible Electronic Devices. *Macromolecules* **2019**, *52*, 2531-2541.
24. Shao, C.; Meng, L.; Wang, M.; Cui, C.; Wang, B.; Han, C. R.; Xu, F.; Yang, J., Mimicking Dynamic Adhesiveness and Strain-Stiffening Behavior of Biological Tissues in Tough and Self-Healable Cellulose Nanocomposite Hydrogels. *ACS Appl. Mater. Interfaces* **2019**, *11*, 5885-5895.
25. Chen, K.; Feng, Y.; Zhang, Y.; Yu, L.; Hao, X.; Shao, F.; Dou, Z.; An, C.; Zhuang, Z.; Luo, Y.; Wang, Y.; Wu, J.; Ji, P.; Chen, T.; Wang, H., Entanglement-

Driven Adhesion, Self-Healing, and High Stretchability of Double-Network PEG-Based Hydrogels. *ACS Appl. Mater. Interfaces* **2019**, *11*, 36458-36468.
